# Supplementary material
Source: PubMed Central journal article supplement (PMC10804124)

A)

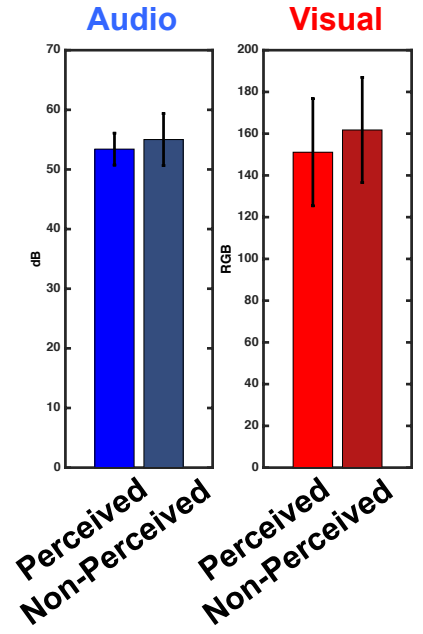

B)

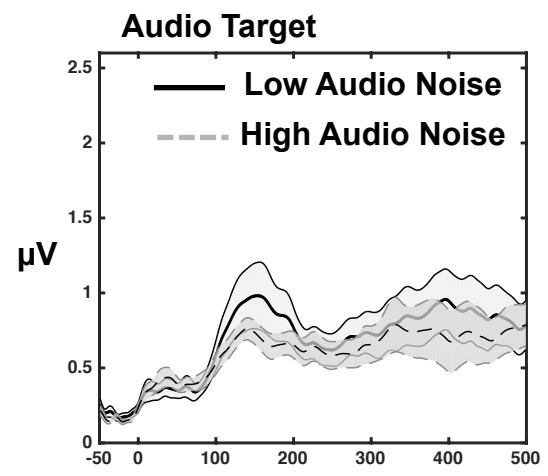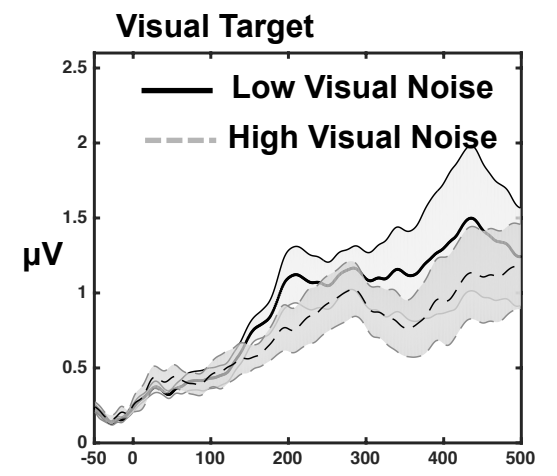

Supplement: NIHMS1955984-supplement-Figure_S1.pdf [file NIHMS1955984-supplement-Figure_S1.pdf]
